# Supplementary material for: Asymmetric assembly of pyrazole and 1,2,3-triazole with a methylene bridge: regioisomerism and energetic properties
Source: Royal Society of Chemistry journal article supplement (doi:10.1039/d2cc02412h), 2022-01-01
Supplement: d2cc02412h1.pdf [file d2cc02412h1.pdf]

## Electronic Supplementary Information (ESI)

**Jin Xiong <sup>a</sup>, Jinxiong Cai <sup>a</sup>, Qi Lai <sup>a</sup>, Ping Yin <sup>a b\*</sup>, and Siping Pang <sup>a \*</sup>**

<sup>a</sup> School of Materials Science & Engineering, Beijing Institute of Technology, Beijing 100081, China.

<sup>b</sup> Beijing Institute of Technology Chongqing Innovation Center, Chongqing 401120, China.

\*Email: pingyin@bit.edu.cn, pangsp@bit.edu.cn.

### Table of Contents

|                                                                    |     |
|--------------------------------------------------------------------|-----|
| 1. Experimental Section.....                                       | S2  |
| 2. Computational Details.....                                      | S8  |
| 3. Crystallographic Data for <b>MPT-1</b> and <b>MPT-2</b> .....   | S9  |
| 4. Crystallographic Bond [Å] and Angles [°] for <b>MPT-1</b> ..... | S11 |
| 5. Crystallographic Bond [Å] and Angles [°] for <b>MPT-2</b> ..... | S13 |
| 6. <sup>1</sup> H and <sup>13</sup> C NMR spectra.....             | S15 |
| 7. DSC curves of the title compounds.....                          | S18 |
| References.....                                                    | S19 |

## 1. Experimental Section

### 1.1 Safety Precaution

In this work, compounds **MPT-1** and **MPT-2** are potential energetic materials that tend to explode under certain external stimuli. Therefore, the whole experimental process should be carried out by using proper safety equipment, such as safety shields, eye protection, and leather gloves.

### 1.2 General methods

All of the reactions were carried out in air. Ammonium 4-amino-3,5-dinitropyrazolate monohydrate, <sup>[1]</sup> 4-amino-5-nitro-1,2,3-triazole <sup>[2]</sup> were prepared following literature procedure, other commercial reagents and solvents were obtained from commercial providers and used without further purification. <sup>1</sup>H NMR and <sup>13</sup>C NMR spectra were recorded at 25 °C on a Bruker 400 MHz and 125 MHz, respectively, and TMS as internal standard. Chemical shifts were reported in parts per million (ppm). The onset decomposition temperature was measured using a TA Instruments DSC25 differential scanning calorimeter at a heating rate of 10 °C min<sup>-1</sup> under dry nitrogen atmosphere. Infrared spectra (IR) were obtained on a PerkinElmer Spectrum BX FT-IR instrument equipped with an ATR unit at 25 °C. Elemental analyses of C/H/N were investigated on a Thermo Scientific Flash 2000 Elemental Analyzer. Impact and friction sensitivities were tested by a BAM fallhammer and friction tester. Densities were determined at room temperature by employing a Micromeritics AccuPyc 1340 gas pycnometer. The crystal structures were produced employing Mercury 2021.1.0 software.

### 1.3 X-ray crystallography

Single Crystal X-ray Diffraction (SCXRD). X-ray diffractions of all single crystals were carried out at 170(2) K or room temperature on a Bruker D8 VENTURE diffractometer using Mo-K $\alpha$  radiation ( $\lambda = 0.71073 \text{ \AA}$ ). Integration and scaling of intensity data were performed using the SAINT program. Data were corrected for the effects of absorption using SADABS. The structures were solved by direct method and refined with full-matrix least-squares technique using SHELX-2014 software.

Non-hydrogen atoms were refined with anisotropic displacement parameters, and hydrogen atoms were placed in calculated positions and refined with a riding model.

Cell refinement: SAINT V8.40A (Bruker, 2016); data reduction: SAINT V8.40A (Bruker, 2016); program(s) used to solve structure: ShelXT (Sheldrick, 2015); program(s) used to refine structure: SHELXL (Sheldrick, 2015); <sup>[3]</sup> molecular graphics: Olex2 (Dolomanov et al., 2009); <sup>[4]</sup> software used to prepare material for publication: Olex2 (Dolomanov et al., 2009).<sup>[4]</sup>

### Data collection of MPT-1-170K

|                                                                                                                                                                                                                                                                                         |                                                                        |
|-----------------------------------------------------------------------------------------------------------------------------------------------------------------------------------------------------------------------------------------------------------------------------------------|------------------------------------------------------------------------|
| Bruker D8 VENTURE diffractometer                                                                                                                                                                                                                                                        | 2018 reflections with $I > 2\sigma(I)$                                 |
| $\phi$ and $\omega$ scans                                                                                                                                                                                                                                                               | $R_{\text{int}} = 0.072$                                               |
| Absorption correction: multi-scan<br><i>SADABS2016/2</i> (Bruker,2016/2) was used for absorption correction. $wR2(\text{int})$ was 0.0869 before and 0.0725 after correction. The Ratio of minimum to maximum transmission is 0.9399. The $\lambda/2$ correction factor is Not present. | $\theta_{\text{max}} = 27.5^\circ$ , $\theta_{\text{min}} = 2.2^\circ$ |
| $T_{\text{min}} = 0.701$ , $T_{\text{max}} = 0.746$                                                                                                                                                                                                                                     | $h = -8 \rightarrow 7$                                                 |
| 14243 measured reflections                                                                                                                                                                                                                                                              | $k = -15 \rightarrow 14$                                               |
| 2626 independent reflections                                                                                                                                                                                                                                                            | $l = -20 \rightarrow 20$                                               |

### Data collection of MPT-1-rt

|                                                                                                                                                                                                                                                                                         |                                                                        |
|-----------------------------------------------------------------------------------------------------------------------------------------------------------------------------------------------------------------------------------------------------------------------------------------|------------------------------------------------------------------------|
| Bruker D8 VENTURE diffractometer                                                                                                                                                                                                                                                        | 2108 reflections with $I > 2\sigma(I)$                                 |
| $\phi$ and $\omega$ scans                                                                                                                                                                                                                                                               | $R_{\text{int}} = 0.050$                                               |
| Absorption correction: multi-scan<br><i>SADABS2016/2</i> (Bruker,2016/2) was used for absorption correction. $wR2(\text{int})$ was 0.1250 before and 0.0653 after correction. The Ratio of minimum to maximum transmission is 0.7952. The $\lambda/2$ correction factor is Not present. | $\theta_{\text{max}} = 27.5^\circ$ , $\theta_{\text{min}} = 2.2^\circ$ |
| $T_{\text{min}} = 0.593$ , $T_{\text{max}} = 0.746$                                                                                                                                                                                                                                     | $h = -8 \rightarrow 8$                                                 |

|                              |                          |
|------------------------------|--------------------------|
| 9578 measured reflections    | $k = -15 \rightarrow 12$ |
| 2669 independent reflections | $l = -20 \rightarrow 20$ |

### Data collection of MPT-2-170K

|                                                                                                                                                                                                                                                                                                                                                                                                                                                                             |                                                                                                                                                                                                                                                                                                    |
|-----------------------------------------------------------------------------------------------------------------------------------------------------------------------------------------------------------------------------------------------------------------------------------------------------------------------------------------------------------------------------------------------------------------------------------------------------------------------------|----------------------------------------------------------------------------------------------------------------------------------------------------------------------------------------------------------------------------------------------------------------------------------------------------|
| <p>Bruker D8 VENTURE diffractometer</p> <p><math>\phi</math> and <math>\omega</math> scans</p> <p>Absorption correction: multi-scan <i>SADABS2016/2</i> (Bruker,2016/2) was used for absorption correction. <math>wR2(int)</math> was 0.0663 before and 0.0543 after correction. The Ratio of minimum to maximum transmission is 0.8047. The <math>\lambda/2</math> correction factor is Not present.</p> <p><math>T_{min} = 0.600</math>, <math>T_{max} = 0.745</math></p> | <p>1701 reflections with <math>I &gt; 2\sigma(I)</math></p> <p><math>R_{int} = 0.043</math></p> <p><math>\theta_{max} = 26.5^\circ</math>, <math>\theta_{min} = 2.1^\circ</math></p> <p><math>h = -8 \rightarrow 8</math></p> <p>8551 measured reflections</p> <p>2352 independent reflections</p> |
|                                                                                                                                                                                                                                                                                                                                                                                                                                                                             |                                                                                                                                                                                                                                                                                                    |

### Data collection of MPT-2-rt

|                                                                                                                                                                                                                                                                                                                                                                                                                                                                              |                                                                                                                                                                                                                                                                                                    |
|------------------------------------------------------------------------------------------------------------------------------------------------------------------------------------------------------------------------------------------------------------------------------------------------------------------------------------------------------------------------------------------------------------------------------------------------------------------------------|----------------------------------------------------------------------------------------------------------------------------------------------------------------------------------------------------------------------------------------------------------------------------------------------------|
| <p>Bruker APEX-II CCD diffractometer</p> <p><math>\phi</math> and <math>\omega</math> scans</p> <p>Absorption correction: multi-scan <i>SADABS2016/2</i> (Bruker,2016/2) was used for absorption correction. <math>wR2(int)</math> was 0.1055 before and 0.0582 after correction. The Ratio of minimum to maximum transmission is 0.8450. The <math>\lambda/2</math> correction factor is Not present.</p> <p><math>T_{min} = 0.630</math>, <math>T_{max} = 0.746</math></p> | <p>1323 reflections with <math>I &gt; 2\sigma(I)</math></p> <p><math>R_{int} = 0.064</math></p> <p><math>\theta_{max} = 27.5^\circ</math>, <math>\theta_{min} = 2.1^\circ</math></p> <p><math>h = -9 \rightarrow 9</math></p> <p>8693 measured reflections</p> <p>2689 independent reflections</p> |
|                                                                                                                                                                                                                                                                                                                                                                                                                                                                              |                                                                                                                                                                                                                                                                                                    |

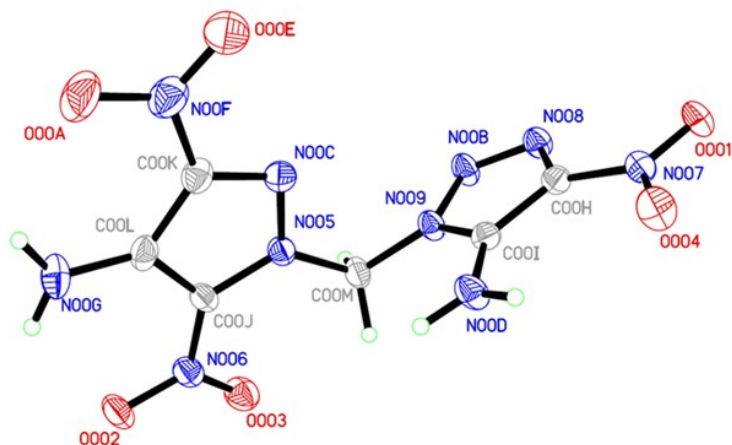

Thermal ellipsoid plot (50%) and labeling scheme for MPT-1-170K.

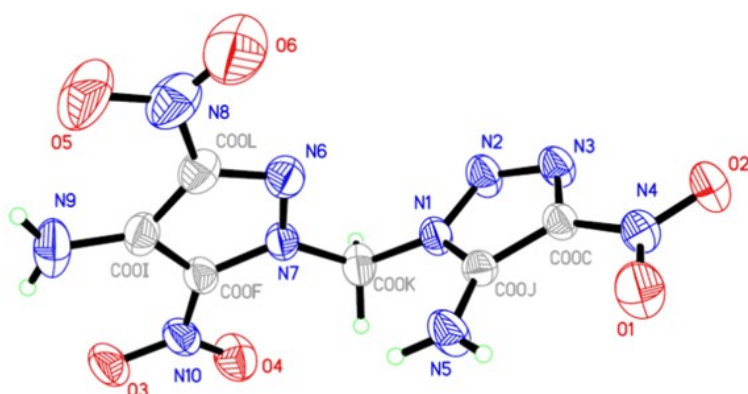

Thermal ellipsoid plot (50%) and labeling scheme for MPT-1-rt.

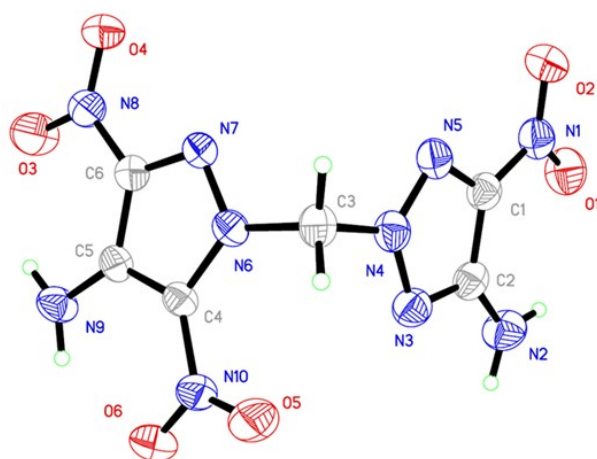

Thermal ellipsoid plot (50%) and labeling scheme for MPT-2-170K.

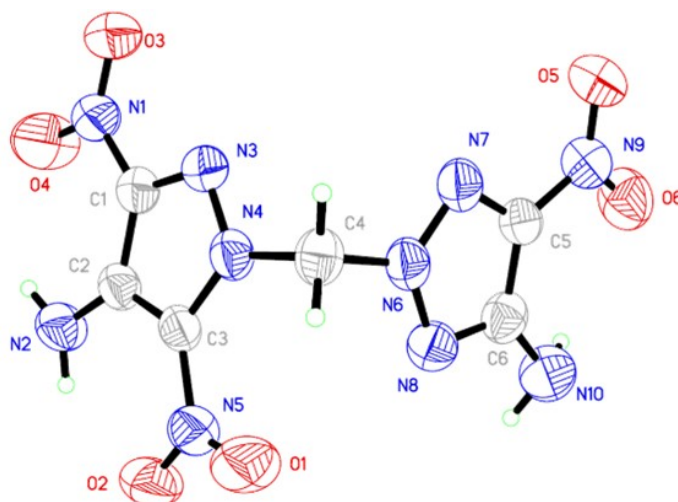

**Thermal ellipsoid plot (50%) and labeling scheme for MPT-2-rt.**

#### 1.4 Synthetic Procedures

**1-(Chloromethyl)-3,5-dinitro-1H-pyrazol-4-amine (CDPA):**  $\text{ClCH}_2\text{I}$  (2 mL) was added to 100 mL round-bottom flask equipped with condenser, ammonium 4-amino-3,5-dinitropyrazolate monohydrate (1 mmol) in DMF (2 mL) was dropped into  $\text{ClCH}_2\text{I}$ . Then the reaction was stirred at 50 °C for 30 min. The reaction was monitored by TLC. After reaction completion, the reaction mixture was allowed to cool down to rt, and  $\text{H}_2\text{O}$  (10 mL) and ether (10 mL) were added to the vessel. The resulting suspension was extracted with ether ( $3 \times 30$  mL). The organic phases were combined and dried over  $\text{Na}_2\text{SO}_4$ . After filtration, the solvent was removed from the filtrate under reduced pressure. The acquired residue was subjected to silica gel column chromatography to give 1-(chloromethyl)-3,5-dinitro-1H-pyrazol-4-amine (50 mg, 25%).  $^1\text{H NMR}$  ( $d_6$ -DMSO):  $\delta$  7.25 (s, 2 H), 6.46 (s, 2 H) ppm.  $^{13}\text{C NMR}$  ( $d_6$ -DMSO):  $\delta$  142.0, 130.9, 129.9, 59.8 ppm.

**((4-Amino-3,5-dinitro-1H-pyrazol-1-yl)methyl)-4-nitro-1H-1,2,3-triazol-5-amine:** 1-(Chloromethyl)-3,5-dinitro-1H-pyrazol-4-amine CDPA (1mmol), 5-nitro-2H-1,2,3-triazol-4-amine (2 mmol), KOH (2 mmol), KI (1 mmol) and DMF (5 mL) were added to 100 mL round-bottom flask equipped with condenser. Then the reaction was stirred at 80 °C for 12 h. The reaction mixture was allowed to cool down

to rt, and H<sub>2</sub>O (15 mL) was added to the vessel. The resulting suspension was extracted with ethyl acetate (3 × 30 mL). The organic phases were combined and dried over Na<sub>2</sub>SO<sub>4</sub>. After filtration, the solvent was removed from the solution under reduced pressure. The acquired residue was subjected to silica gel column chromatography to give 1-((4-amino-3,5-dinitro-1H-pyrazol-1-yl)methyl)-4-nitro-1H-1,2,3-triazol-5-amine (**MPT-1**, 94 mg ) and 2-((4-amino-3,5-dinitro-1H-pyrazol-1-yl)methyl)-5-nitro-2H-1,2,3-triazol-4-amine (**MPT-2**, 126 mg ).

Compound **MPT-1** (1-((4-amino-3,5-dinitro-1H-pyrazol-1-yl)methyl)-4-nitro-1H-1,2,3-triazol-5-amine)

Yellow solid, 30% yield.  $T_m = 175\text{ }^\circ\text{C}$ ,  $T_d$  (onset) = 190 °C. <sup>1</sup>H NMR (400 MHz, *d*<sub>6</sub>-DMSO)  $\delta$  8.13 (s, 2 H), 7.40 (s, 2 H), 7.00 (s, 2 H) ppm. <sup>13</sup>C NMR (101 MHz, *d*<sub>6</sub>-DMSO)  $\delta$  142.6, 141.1, 135.7, 131.4, 130.6, 61.7 ppm. IR (KBr):  $\tilde{\nu}$  3595, 3365, 2838, 1759, 1734, 1662, 1605, 1548, 1479, 1422, 1333, 1288, 1241, 1201, 1183, 1075, 1007, 966, 849, 793, 770, 725, 698, 633, 561, 530, 425 cm<sup>-1</sup>. Elemental analysis of C<sub>6</sub>H<sub>6</sub>N<sub>10</sub>O<sub>6</sub> (314.05): calcd C 22.94, H 1.93, N 44.58%; found: C 22.56, H 1.67, N 44.12%.

Compound **MPT-2** (2-((4-amino-3,5-dinitro-1H-pyrazol-1-yl)methyl)-4-nitro-1H-1,2,3-triazol-5-amine)

Yellow solid, 40% yield.  $T_m = 194\text{ }^\circ\text{C}$ ,  $T_d$  (onset) = 269 °C. <sup>1</sup>H NMR (400 MHz, *d*<sub>6</sub>-DMSO)  $\delta$  7.45 (s, 2 H), 6.99 (s, 2 H), 6.86 (s, 2 H) ppm. <sup>13</sup>C NMR (101 MHz, *d*<sub>6</sub>-DMSO)  $\delta$  149.3, 142.1, 138.9, 130.7, 130.6, 68.7 ppm. IR (KBr):  $\tilde{\nu}$  3595, 3365, 2838, 1759, 1734, 1662, 1605, 1548, 1479, 1422, 1333, 1288, 1241, 1201, 1183, 1074, 1007, 966, 849, 793, 770, 725, 698, 633, 561, 530, 425 cm<sup>-1</sup>. Elemental analysis of C<sub>6</sub>H<sub>6</sub>N<sub>10</sub>O<sub>6</sub> (314.05): calcd C 22.94, H 1.93, N 44.58%; found: C 23.12, H 2.04, N 44.09%.

## 2. Computational Details

The heats of formation of compounds **MPT-1** and **MPT-2** were performed by using the Gaussian 09 suite of programs.<sup>[5]</sup> Gas phase heats of formation of the title compounds were computed based on an isodesmic reaction (Fig. S1). The enthalpy of reaction was carried out by combining the M062X/6-311++G\*\* energy difference for the reactions, the scaled zero-point energies (ZPE), values of thermal correction (HT), and other thermal factors. The solid state heats of formation were further obtained by employing Trouton's rule according to equation 1 (T represents either melting point or decomposition temperature when no melting occurs prior to decomposition).<sup>[6]</sup>

$$\Delta H_{sub} = 188/J\ mol^{-1}\ K^{-1} \times T\ (1)$$

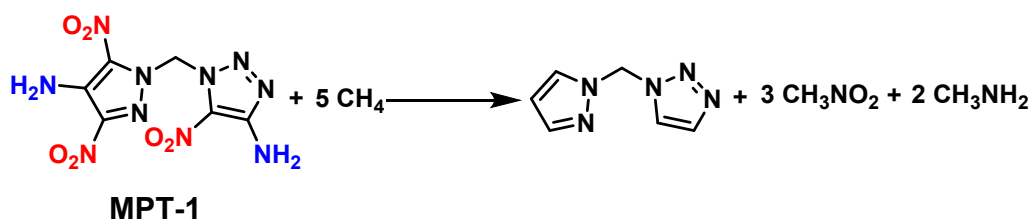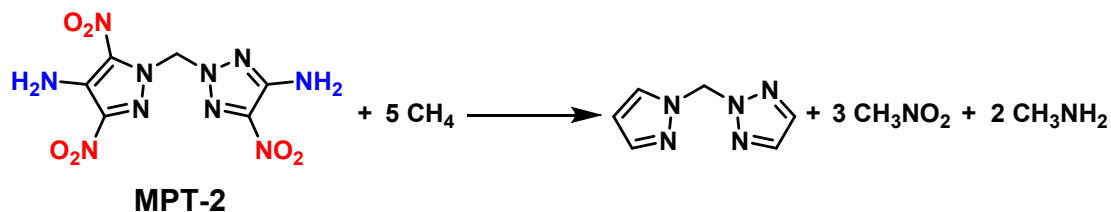



### 3. Crystallographic data for MPT-1 and MPT-2

|                                               | <b>MPT-1-170K</b>                                            | <b>MPT-2-170K</b>                                            |
|-----------------------------------------------|--------------------------------------------------------------|--------------------------------------------------------------|
| CCDC No.                                      | 2182866                                                      | 2178121                                                      |
| Empirical Formula                             | C <sub>6</sub> H <sub>6</sub> N <sub>10</sub> O <sub>6</sub> | C <sub>6</sub> H <sub>6</sub> N <sub>10</sub> O <sub>6</sub> |
| Formula Weight                                | 314.21                                                       | 314.21                                                       |
| Temperature (K)                               | 170                                                          | 170                                                          |
| Crystal System                                | orthorhombic                                                 | Monoclinic                                                   |
| Space group                                   | <i>P2<sub>1</sub>/2<sub>1</sub>/2<sub>1</sub></i>            | <i>P2<sub>1</sub>/n</i>                                      |
| Unit cell dimensions                          |                                                              |                                                              |
| a (Å)                                         | 6.2740(4)                                                    | 7.1538(55)                                                   |
| b (Å)                                         | 11.6263(7)                                                   | 8.2580(14)                                                   |
| c (Å)                                         | 15.6940 (9)                                                  | 19.830(3)                                                    |
| α (°)                                         | 90                                                           | 90                                                           |
| β (°)                                         | 90                                                           | 95.353(5)                                                    |
| γ (°)                                         | 90                                                           | 90                                                           |
| Volume (Å <sup>3</sup> )                      | 1144.77(12)                                                  | 1166.4(3)                                                    |
| Z                                             | 4                                                            | 4                                                            |
| Density (g cm <sup>-3</sup> )<br>(calculated) | 1.823                                                        | 1.789                                                        |
| F(000)                                        | 640.0                                                        | 640                                                          |
| Crystal size (mm <sup>3</sup> )               | 0.130 x 0.050 x<br>0.040                                     | 0.08 x 0.05 x 0.04                                           |
| Goodness-of-fit on F <sup>2</sup>             | 1.075                                                        | 1.107                                                        |
| Final R indexes [I>=2σ<br>(I)]                | R <sub>1</sub> = 0.0435 wR <sub>2</sub> =<br>0.0845          | R <sub>1</sub> = 0.0715, wR <sub>2</sub> =<br>0.1668         |
| Final R indexes [all data]                    | R <sub>1</sub> = 0.0711, wR <sub>2</sub> =<br>= 0.0975       | R <sub>1</sub> = 0.1026, wR <sub>2</sub> =<br>0.1830         |

|                      | <b>MPT-1rt</b>                                               | <b>MPT-2rt</b>                                               |
|----------------------|--------------------------------------------------------------|--------------------------------------------------------------|
| CCDC No.             | 2194551                                                      | 2182865                                                      |
| Empirical Formula    | C <sub>6</sub> H <sub>6</sub> N <sub>10</sub> O <sub>6</sub> | C <sub>6</sub> H <sub>6</sub> N <sub>10</sub> O <sub>6</sub> |
| Formula Weight       | 314.21                                                       | 314.21                                                       |
| Temperature (K)      | 298                                                          | 298                                                          |
| Crystal System       | orthorhombic                                                 | Monoclinic                                                   |
| Space group          | <i>P2<sub>1</sub>/2<sub>1</sub>/2<sub>1</sub></i>            | <i>P2<sub>1</sub>/n</i>                                      |
| Unit cell dimensions |                                                              |                                                              |
| a (Å)                | 6.2935(3)                                                    | 7.1738(8)                                                    |
| b (Å)                | 11.7191(5)                                                   | 8.3136(10)                                                   |

|                                               |                                                        |                                                      |
|-----------------------------------------------|--------------------------------------------------------|------------------------------------------------------|
| c (Å)                                         | 15.8519(7)                                             | 19.948 (3)                                           |
| $\alpha$ (°)                                  | 90                                                     | 90                                                   |
| $\beta$ (°)                                   | 90                                                     | 95.253(4)                                            |
| $\gamma$ (°)                                  | 90                                                     | 90                                                   |
| Volume (Å <sup>3</sup> )                      | 1169.14(9)                                             | 1184.7(2)                                            |
| Z                                             | 4                                                      | 4                                                    |
| Density (g cm <sup>-3</sup> )<br>(calculated) | 1.785                                                  | 1.762                                                |
| F(000)                                        | 640.0                                                  | 640                                                  |
| Crystal size (mm <sup>3</sup> )               | 0.12 x 0.08 x<br>0.05                                  | 0.12 x 0.08 x 0.05                                   |
| Goodness-of-fit on F <sup>2</sup>             | 1.045                                                  | 1.059                                                |
| Final R indexes [ $I \geq 2\sigma$<br>(I)]    | R <sub>1</sub> = 0.0392 wR <sub>2</sub> =<br>0.0835    | R <sub>1</sub> = 0.0717, wR <sub>2</sub> =<br>0.1699 |
| Final R indexes [all data]                    | R <sub>1</sub> = 0.0583, wR <sub>2</sub> =<br>= 0.0945 | R <sub>1</sub> = 0.1650, wR <sub>2</sub> =<br>0.2161 |

---

#### 4. Crystallographic bond lengths [Å] and angles [°] for MPT-1

##### MPT-1-170K

|                      |          |                      |           |
|----------------------|----------|----------------------|-----------|
| O(001)-N(007)        | 1.239(3) | N(009)-C(00I)        | 1.354(4)  |
| O(002)-N(006)        | 1.241(4) | N(009)-C(00M)        | 1.433(4)  |
| O(003)-N(006)        | 1.238(4) | O(00A)-N(00F)        | 1.238(4)  |
| O(004)-N(007)        | 1.243(3) | N(00C)-C(00K)        | 1.332(4)  |
| N(005)-N(00C)        | 1.329(4) | N(00D)-C(00I)        | 1.318(4)  |
| N(005)-C(00J)        | 1.378(4) | O(00E)-N(00F)        | 1.225(4)  |
| N(005)-C(00M)        | 1.474(4) | N(00F)-C(00K)        | 1.427(5)  |
| N(006)-C(00J)        | 1.391(4) | N(00G)-C(00L)        | 1.339(4)  |
| N(007)-C(00H)        | 1.396(4) | C(00H)-C(00I)        | 1.392(5)  |
| N(008)-N(00B)        | 1.291(4) | C(00J)-C(00L)        | 1.393(5)  |
| N(008)-C(00H)        | 1.354(4) | C(00K)-C(00L)        | 1.405(5)  |
| N(009)-N(00B)        | 1.387(4) |                      |           |
| N(00C)-N(005)-C(00J) | 111.3(3) | O(00E)-N(00F)-C(00K) | 120.1(3)  |
| N(00C)-N(005)-C(00M) | 120.5(3) | N(008)-C(00H)-N(007) | 122.5(3)  |
| C(00J)-N(005)-C(00M) | 128.2(3) | N(008)-C(00H)-C(00I) | 110.9(3)  |
| O(002)-N(006)-C(00J) | 117.1(3) | C(00I)-C(00H)-N(007) | 126.6(3)  |
| O(003)-N(006)-O(002) | 123.1(3) | N(009)-C(00I)-C(00H) | 102.0(3)  |
| O(003)-N(006)-C(00J) | 119.8(3) | N(00D)-C(00I)-N(009) | 125.9(3)  |
| O(001)-N(007)-O(004) | 123.3(3) | N(00D)-C(00I)-C(00H) | 132.1(3)  |
| O(001)-N(007)-C(00H) | 119.1(3) | N(005)-C(00J)-N(006) | 123.8(3)  |
| O(004)-N(007)-C(00H) | 117.6(3) | N(005)-C(00J)-C(00L) | 108.3(3)  |
| N(00B)-N(008)-C(00H) | 108.6(3) | N(006)-C(00J)-C(00L) | 127.8(3)  |
| N(00B)-N(009)-C(00M) | 119.3(3) | N(00C)-C(00K)-N(00F) | 119.6(3)  |
| C(00I)-N(009)-N(00B) | 111.3(3) | N(00C)-C(00K)-C(00L) | 114.3(3)  |
| C(00I)-N(009)-C(00M) | 128.8(3) | C(00L)-C(00K)-N(00F) | 126.1(3)  |
| N(005)-N(00B)-N(009) | 107.2(3) | N(00G)-C(00L)-C(00J) | 128.3(3)  |
| N(005)-N(00C)-C(00K) | 104.6(3) | N(00G)-C(00L)-C(00K) | 130.2(3)  |
| O(00A)-N(00F)-C(00K) | 115.3(3) | C(00J)-C(00L)-C(00K) | 101.5(3)  |
| O(00E)-N(00F)-O(00A) | 124.7(3) | N(009)-C(00M)-C(005) | 110.1 (3) |

## MPT-1-rt

|              |           |                |           |
|--------------|-----------|----------------|-----------|
| O2—N4        | 1.230 (3) | N3—C00C        | 1.351 (3) |
| N7—N6        | 1.326 (3) | N10—C00F       | 1.402 (4) |
| N7—C00F      | 1.370 (3) | N6—C00L        | 1.331 (4) |
| N7—C00K      | 1.464 (4) | C00C—C00J      | 1.385 (4) |
| O3—N10       | 1.236 (3) | O5—N8          | 1.237 (4) |
| O4—N10       | 1.220 (3) | N8—C00L        | 1.434 (4) |
| O1—N4        | 1.234 (3) | N8—O6          | 1.209 (4) |
| N4—C00C      | 1.395 (4) | C00F—C00I      | 1.394 (4) |
| N1—N2        | 1.386 (3) | N5—C00J        | 1.319 (3) |
| N1—C00J      | 1.354 (4) | N9—C00I        | 1.333 (4) |
| N1—C00K      | 1.431 (3) | C00I—C00L      | 1.401 (4) |
| N3—N2        | 1.287 (3) |                |           |
|              |           |                |           |
| N6—N7—C00F   | 111.2 (2) | C00J—C00C—N4   | 126.7 (2) |
| N6—N7—C00K   | 120.2 (2) | O5—N8—C00L     | 114.7 (3) |
| C00F—N7—C00K | 128.5 (2) | O6—N8—O5       | 125.3 (3) |
| O2—N4—O1     | 123.1 (2) | O6—N8—C00L     | 120.1 (3) |
| O2—N4—C00C   | 119.4 (2) | N7—C00F—N10    | 123.8 (3) |
| O1—N4—C00C   | 117.5 (2) | N7—C00F—C00I   | 108.7 (2) |
| N2—N1—C00K   | 119.5 (2) | C00I—C00F—N10  | 127.5 (3) |
| C00J—N1—N2   | 110.9 (2) | C00F—C00I—C00L | 100.9 (2) |
| C00J—N1—C00K | 129.1 (2) | N9—C00I—C00F   | 128.7 (3) |
| N2—N3—C00C   | 108.6 (2) | N9—C00I—C00L   | 130.4 (3) |
| O3—N10—C00F  | 116.9 (3) | N1—C00J—C00C   | 102.3 (2) |
| O4—N10—O3    | 123.5 (3) | N5—C00J—N1     | 125.4 (3) |
| O4—N10—C00F  | 119.6 (2) | N5—C00J—C00C   | 132.3 (3) |
| N3—N2—N1     | 107.4 (2) | N1—C00K—N7     | 110.8 (2) |
| N7—N6—C00L   | 104.5 (2) | N6—C00L—N8     | 119.1 (3) |
| N3—C00C—N4   | 122.4 (2) | N6—C00L—C00I   | 114.6 (3) |
| N3—C00C—C00J | 110.8 (2) | C00I—C00L—N8   | 126.3 (3) |

## 5. Crystallographic bond Lengths [Å] and angles [°] for MPT-2

### MPT-2-170K

|           |           |          |           |
|-----------|-----------|----------|-----------|
| N6—N7     | 1.329 (4) | O4—N8    | 1.230 (4) |
| N6—C4     | 1.382 (5) | N4—N3    | 1.356 (4) |
| N6—C3     | 1.458 (5) | N4—C3    | 1.438 (5) |
| N7—C6     | 1.327 (5) | N4—N5    | 1.312 (5) |
| C5—C6     | 1.412 (5) | N3—C2    | 1.337 (5) |
| C5—C4     | 1.392 (5) | N2—C2    | 1.339 (5) |
| C5—N9     | 1.345 (5) | N5—C1    | 1.334 (5) |
| C6—N8     | 1.418 (5) | C1—C2    | 1.418 (5) |
| C4—N10    | 1.408 (5) | C1—N1    | 1.415 (5) |
| O6—N10    | 1.251 (4) | O1—N1    | 1.235 (5) |
| N10—O5    | 1.227 (4) | O2—N1    | 1.223 (4) |
| O3—N8     | 1.228 (4) |          |           |
|           |           |          |           |
| N7—N6—C4  | 111.2 (3) | O3—N8—O4 | 123.9 (4) |
| N7—N6—C3  | 117.3 (3) | O4—N8—C6 | 119.9 (3) |
| C4—N6—C3  | 131.2 (3) | N3—N4—C3 | 122.3 (3) |
| C6—N7—N6  | 105.1 (3) | N5—N4—N3 | 117.4 (3) |
| C4—C5—C6  | 101.7 (3) | N5—N4—C3 | 120.1 (3) |
| N9—C5—C6  | 129.4 (4) | C2—N3—N4 | 103.3 (3) |
| N9—C5—C4  | 128.9 (4) | N4—C3—N6 | 110.2 (3) |
| N7—C6—C5  | 113.9 (3) | N4—N5—C1 | 101.7 (3) |
| N7—C6—N8  | 119.2 (3) | N5—C1—C2 | 111.2 (4) |
| C5—C6—N8  | 126.9 (3) | N5—C1—N1 | 120.9 (4) |
| N6—C4—C5  | 108.1 (3) | N1—C1—C2 | 127.9 (4) |
| N6—C4—N10 | 124.6 (3) | N3—C2—C1 | 106.4 (3) |
| C5—C4—N10 | 127.3 (3) | N2—C2—N3 | 124.0 (4) |
| O6—N10—C4 | 115.6 (3) | N2—C2—C1 | 129.5 (4) |
| O5—N10—C4 | 120.6 (3) | O1—N1—C1 | 116.1 (3) |
| O5—N10—O6 | 123.8 (3) | O2—N1—C1 | 118.7 (4) |
| O3—N8—C6  | 116.3 (3) | O2—N1—O1 | 125.2 (4) |

## MPT-2-rt

|            |           |               |            |
|------------|-----------|---------------|------------|
| N4—N3      | 1.321 (4) | N2—C2         | 1.338 (5)  |
| N4—C3      | 1.380 (5) | N2—H2A        | 0.854 (19) |
| N4—C4      | 1.447 (5) | N2—H2B        | 0.860 (19) |
| N6—N7      | 1.310 (4) | N9—C5         | 1.419 (6)  |
| N6—N8      | 1.345 (5) | N1—C1         | 1.419 (5)  |
| N6—C4      | 1.432 (5) | N1—O4         | 1.219 (5)  |
| O3—N1      | 1.218 (4) | C3—C2         | 1.374 (5)  |
| N3—C1      | 1.324 (5) | N10—H10A      | 0.8600     |
| O2—N5      | 1.249 (4) | N10—H10B      | 0.8600     |
| N7—C5      | 1.325 (5) | N10—C6        | 1.331 (5)  |
| N5—O1      | 1.225 (5) | C1—C2         | 1.403 (5)  |
| N5—C3      | 1.418 (5) | C5—C6         | 1.398 (5)  |
| O5—N9      | 1.214 (5) | C4—H4A        | 0.9700     |
| O6—N9      | 1.236 (5) | C4—H4B        | 0.9700     |
| N8—C6      | 1.341 (6) |               |            |
| N3—N4—C3   | 110.9 (3) | C2—C3—N5      | 127.7 (4)  |
| N3—N4—C4   | 117.1 (3) | H10A—N10—H10B | 120.0      |
| C3—N4—C4   | 131.6 (3) | C6—N10—H10A   | 120.0      |
| N7—N6—N8   | 117.0 (3) | C6—N10—H10B   | 120.0      |
| N7—N6—C4   | 120.2 (3) | N3—C1—N1      | 118.8 (4)  |
| N8—N6—C4   | 122.6 (3) | N3—C1—C2      | 114.2 (4)  |
| N4—N3—C1   | 104.8 (3) | C2—C1—N1      | 127.0 (4)  |
| N6—N7—C5   | 101.5 (3) | N7—C5—N9      | 120.4 (4)  |
| O2—N5—C3   | 115.4 (4) | N7—C5—C6      | 112.0 (4)  |
| O1—N5—O2   | 123.7 (4) | C6—C5—N9      | 127.6 (4)  |
| O1—N5—C3   | 121.0 (4) | N2—C2—C3      | 129.0 (4)  |
| C6—N8—N6   | 103.5 (3) | N2—C2—C1      | 129.4 (4)  |
| C2—N2—H2A  | 115 (3)   | C3—C2—C1      | 101.5 (3)  |
| C2—N2—H2B  | 117 (3)   | N4—C4—H4A     | 109.4      |
| H2A—N2—H2B | 128 (4)   | N4—C4—H4B     | 109.4      |

|          |           |            |           |
|----------|-----------|------------|-----------|
| O5—N9—O6 | 124.8 (4) | N6—C4—N4   | 111.0 (3) |
| O5—N9—C5 | 119.2 (4) | N6—C4—H4A  | 109.4     |
| O6—N9—C5 | 115.9 (4) | N6—C4—H4B  | 109.4     |
| O3—N1—C1 | 120.3 (4) | H4A—C4—H4B | 108.0     |
| O3—N1—O4 | 123.0 (4) | N8—C6—C5   | 105.9 (4) |
| O4—N1—C1 | 116.6 (4) | N10—C6—N8  | 123.8 (4) |
| N4—C3—N5 | 123.7 (4) | N10—C6—C5  | 130.2 (4) |
| C2—C3—N4 | 108.6 (3) |            |           |

## 6. $^1\text{H}$ and $^{13}\text{C}$ NMR spectra for all new compounds.

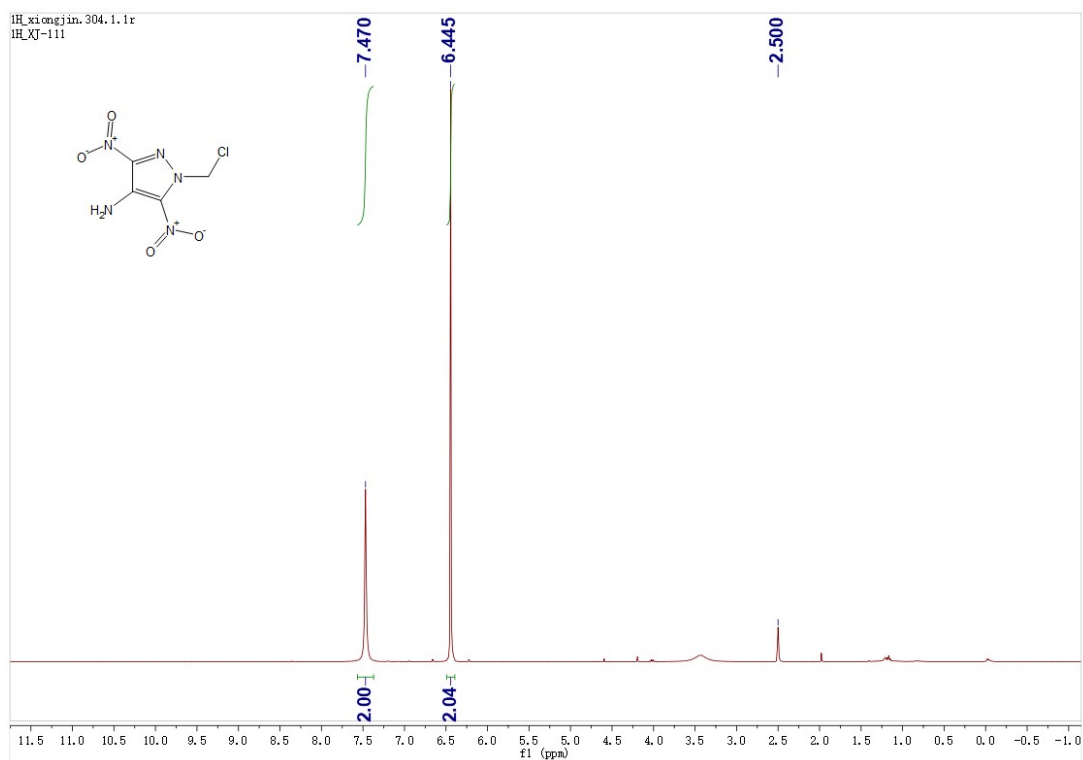

Figure 1.  $^1\text{H}$  NMR spectrum of CDPA in  $d_6$ -DMSO.

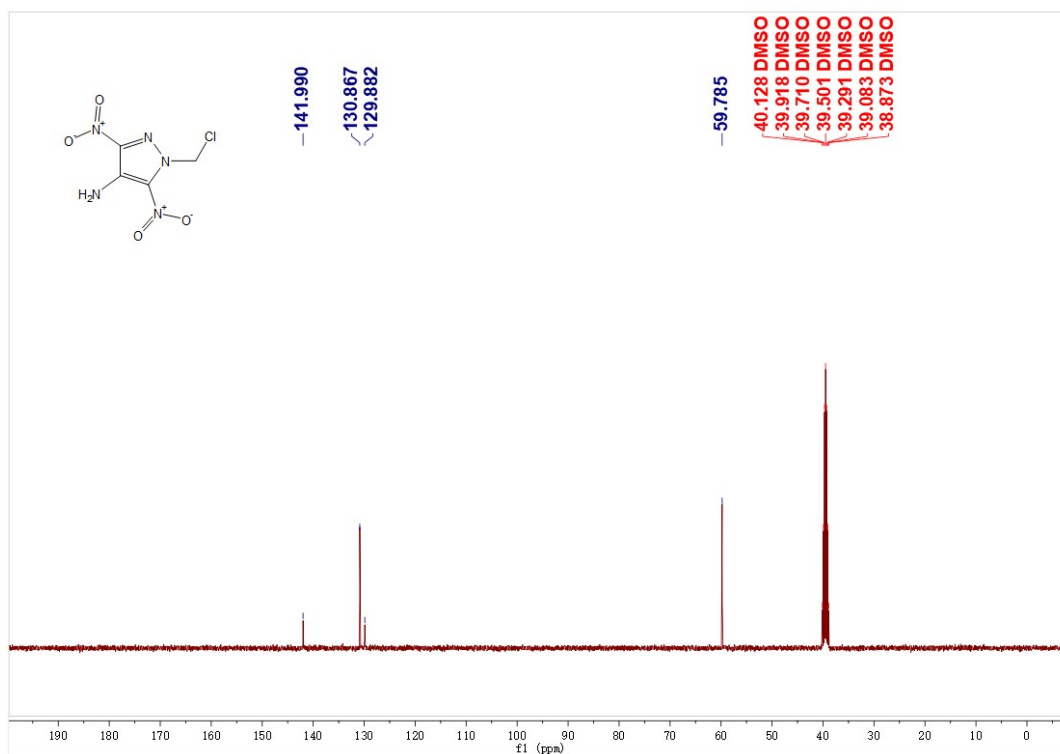

Figure 2.  $^{13}\text{C}$  NMR spectrum of CDPA in  $d_6$ -DMSO.

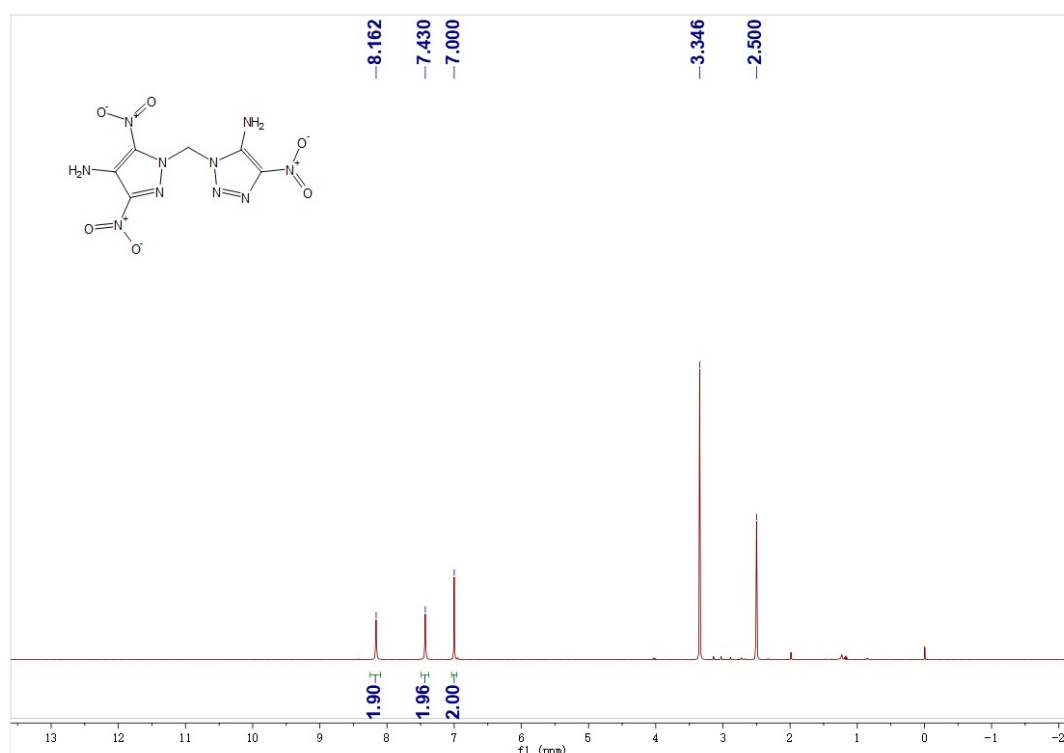

Figure 3.  $^1\text{H}$  NMR spectrum of MPT-1 in  $d_6$ -DMSO.



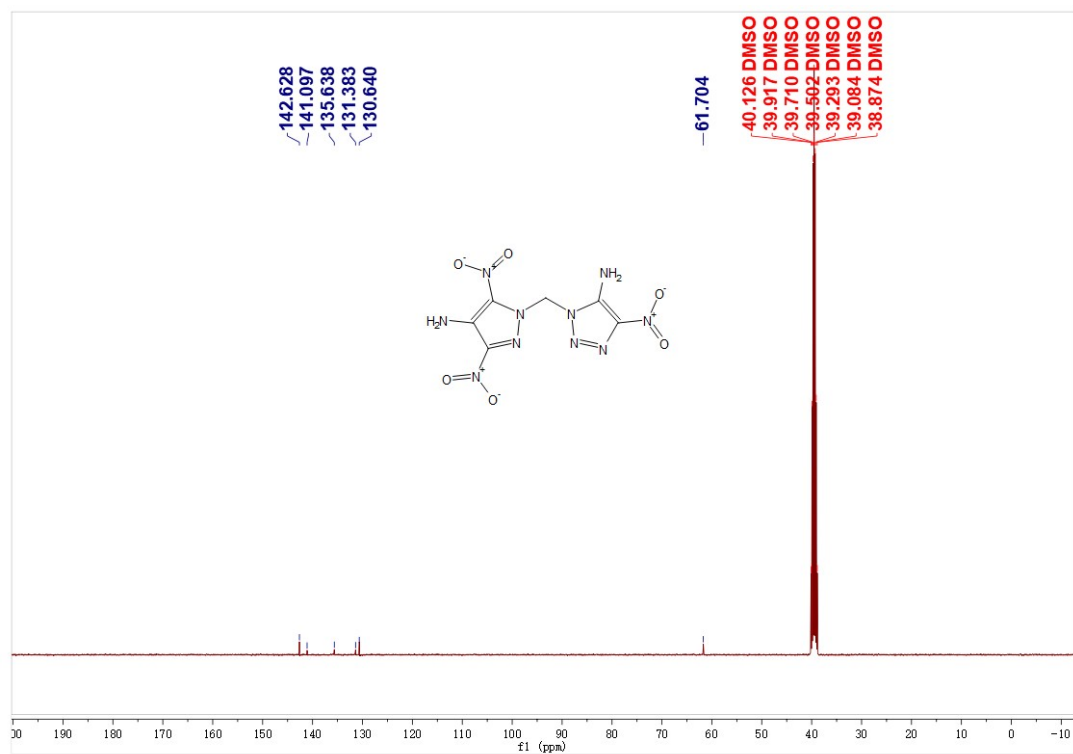

Figure 4.  $^{13}\text{C}$  NMR spectrum of MPT-1 in  $d_6$ -DMSO.

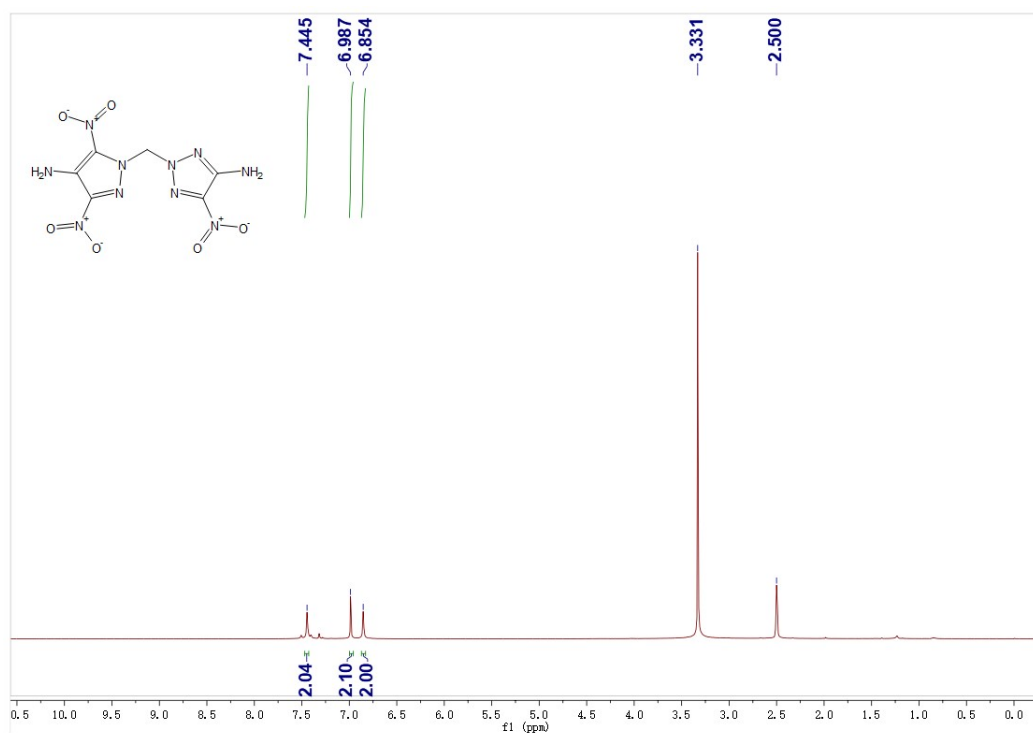

Figure 5.  $^1\text{H}$  NMR spectrum of MPT-2 in  $d_6$ -DMSO.

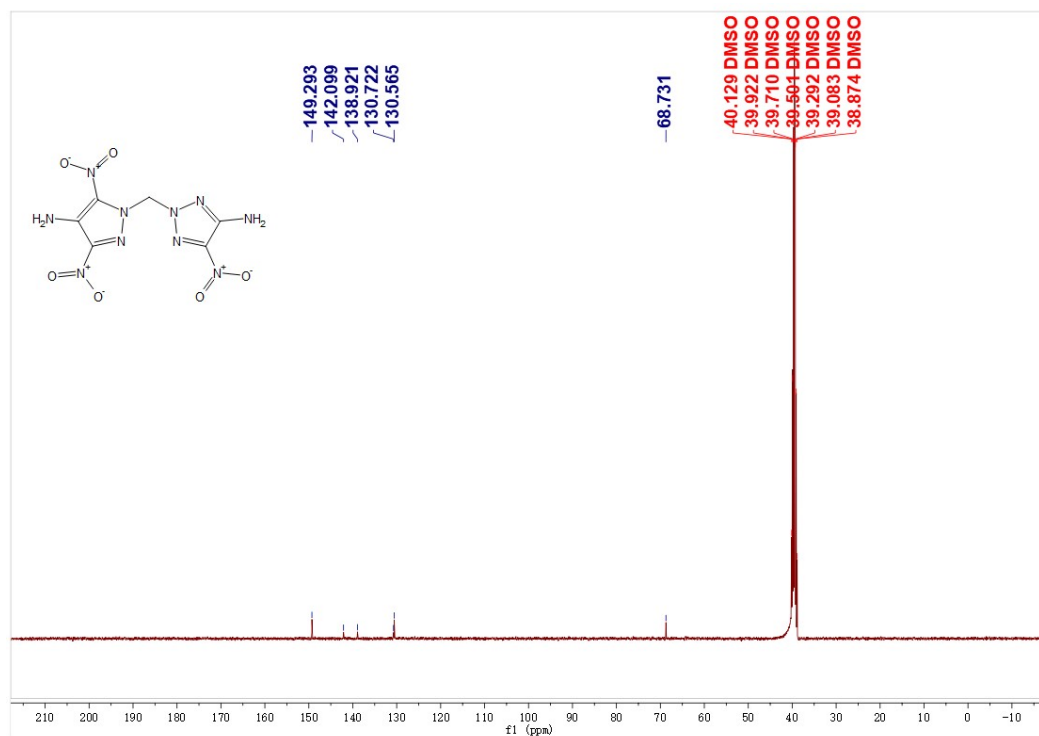

Figure 6. <sup>13</sup>C NMR spectrum of MPT-2 in d<sub>6</sub>-DMSO.

## 7. DSC curves of the title compounds

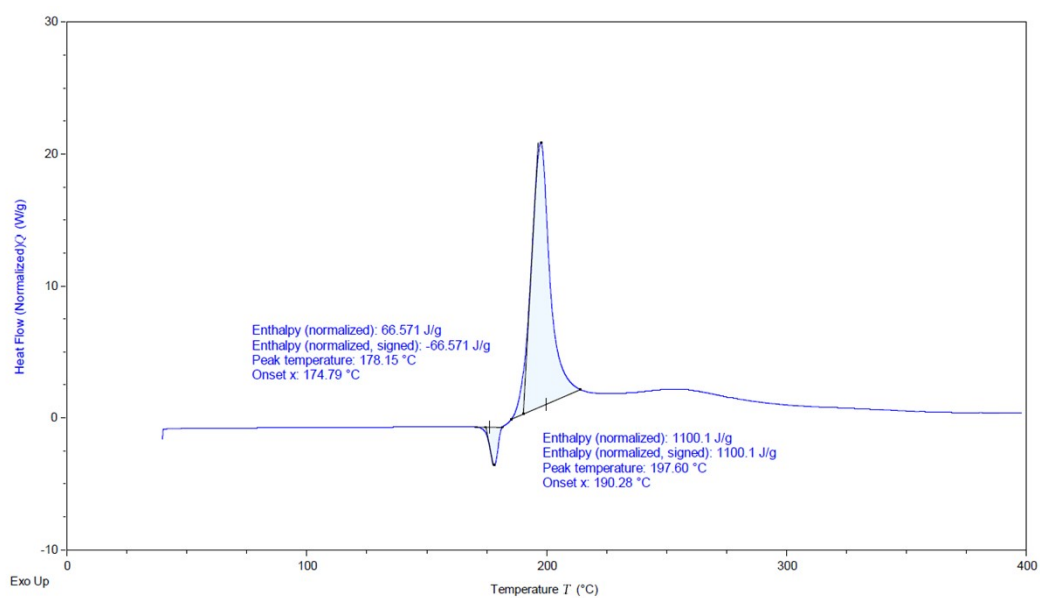

Figure 7. DSC curve of compound MPT-1 at 10 °C min<sup>-1</sup>

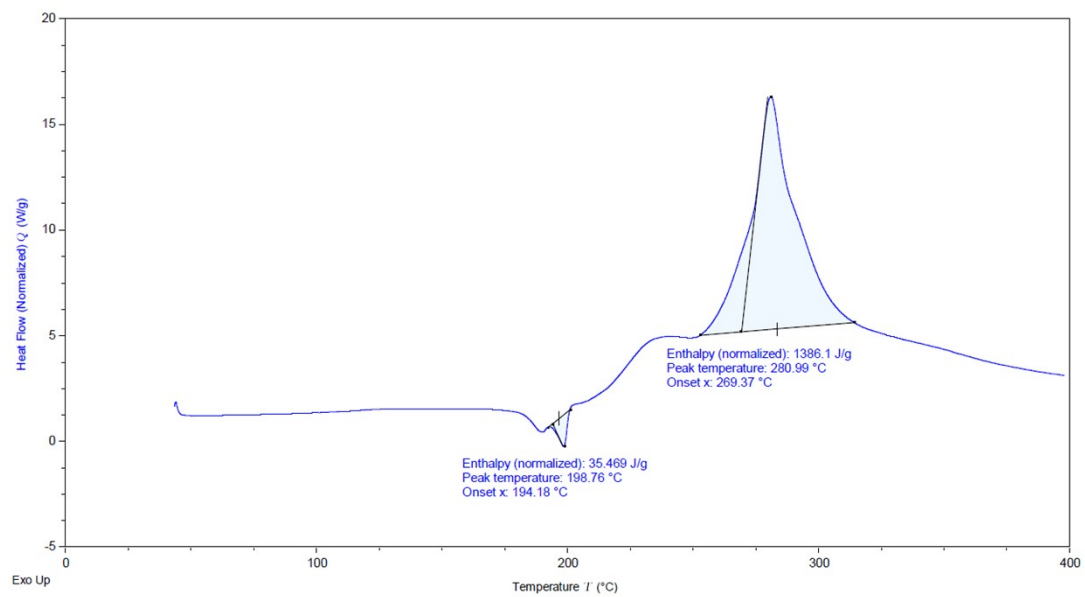

Figure 8. DSC curve of compound **MPT-2** at  $10\text{ °C min}^{-1}$

## References

- 1 P. Yin, J. H. Zhang, D. A. Parrish and J. M. Shreeve, *Chem. Eur. J.* 2014, **20**, 16529-16536.
- 2 Y. Q. Zhang, D. A. Parrish and J. M. Shreeve, *J. Mater. Chem. A*, 2013, **1**, 585-593.
- 3 G. M. Sheldrick, *Acta Cryst. C* 2015, **71**, 3-8.
- 4 O. V. Dolomanov, L. J. Bourhis, R. J. Gildea, J. A. K. Howard, and H. Puschmann, *J. Appl. Cryst.* 2009, **42**, 339-341.
- 5 (a) A. D. Becke, *J. Phys. Chem.* 1993, **98**, 5648-5652; (b) P. J. Stephens, F. J. Devlin, C. F. Chabalowski and M. J. Frisch, *J. Phys. Chem.* 1994, **98**, 11623-11627.
- 6 M. S. Westwell, M. S. Searle and D. H. Williams, *J. Am. Chem. Soc.* 1995, **117**, 5013-5015.
